# Supplementary material for: Molecular electronics: connection across nano-sized electrode gaps
Source: Royal Society of Chemistry journal article supplement (doi:10.1039/b615538c), 2007-01-01
Supplement: b615538c.pdf [file b615538c.pdf]

## Molecular electronics: connection across nano-sized electrode gaps

G. J. Ashwell, P. Wierzchowiec, C. J. Bartlett and P. D. Buckle

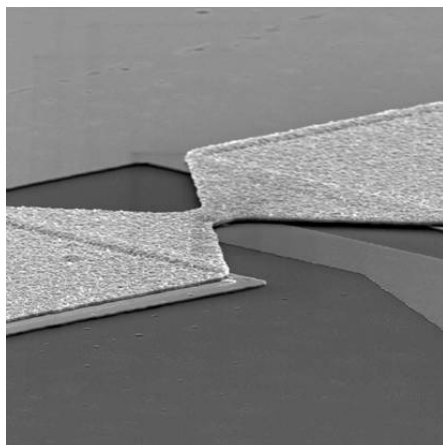

**Fig. 1** SEM image of device

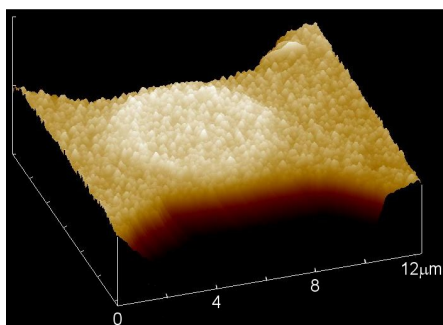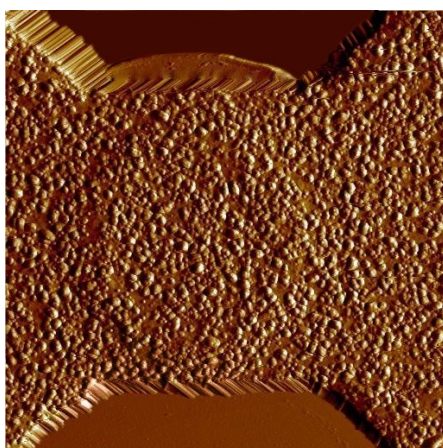

**Fig. 2** AFM images of device.

**Fig. 3** Stages of device fabrication: initial studies focused upon structures with just one connecting gold bridge to an adjacent pad (as shown below) but improved stability was obtained by using a double bridge as reported in the paper.

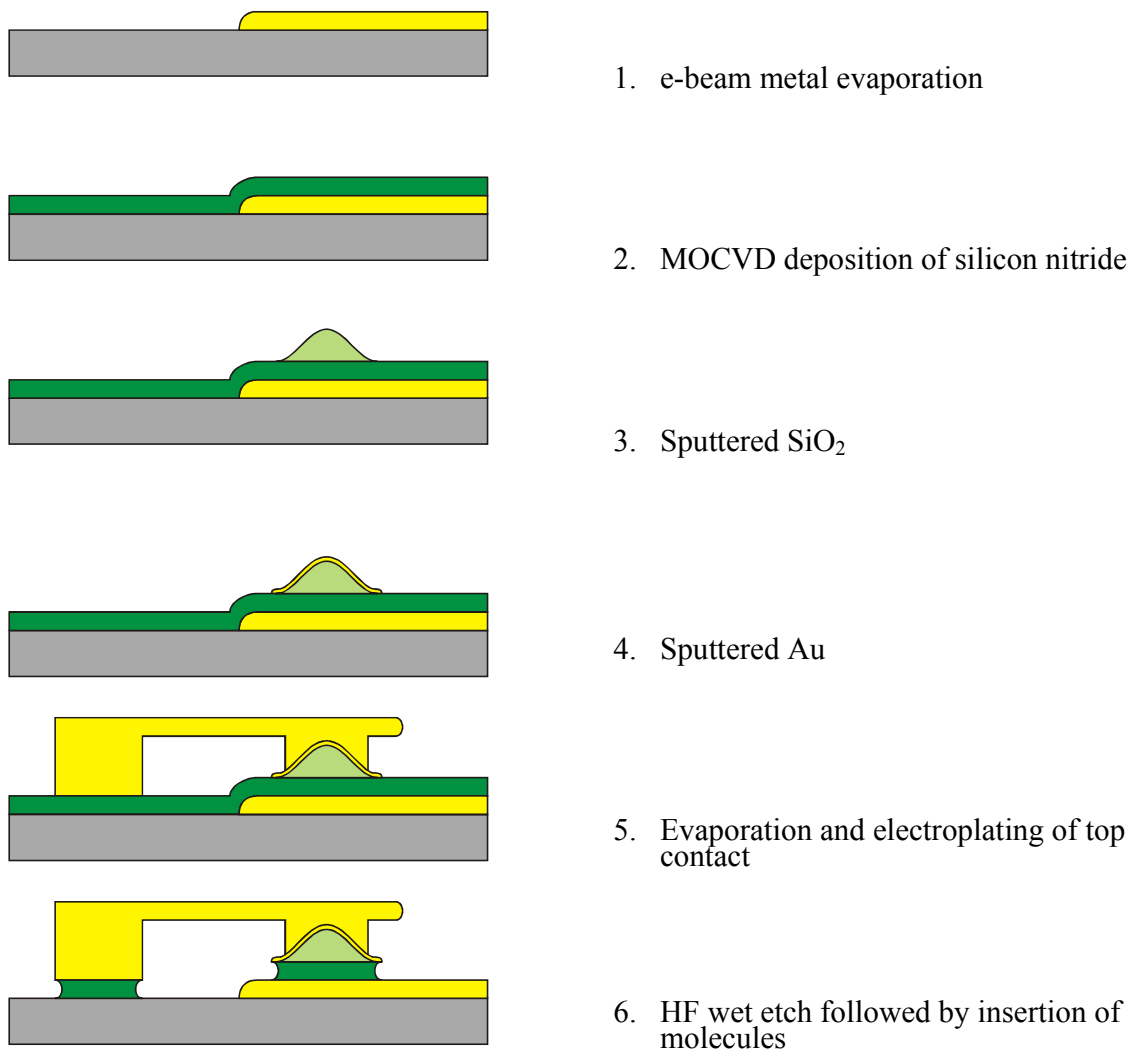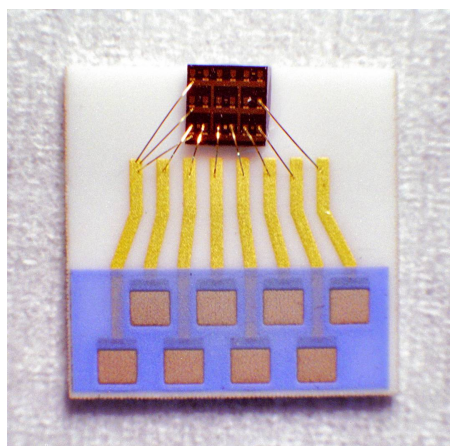

**Fig. 4** Magnified image of eighteen devices on a silicon wafer with seven wires for electrical characterisation.
